# Supplementary material
Source: Springer Nature journal article supplement (https://www.springerprofessional.de/resource/supplementary/13688_2018_137_MOESM1_ESM.pdf/15705494)
Supplement: MOESM1 [file 15705494]

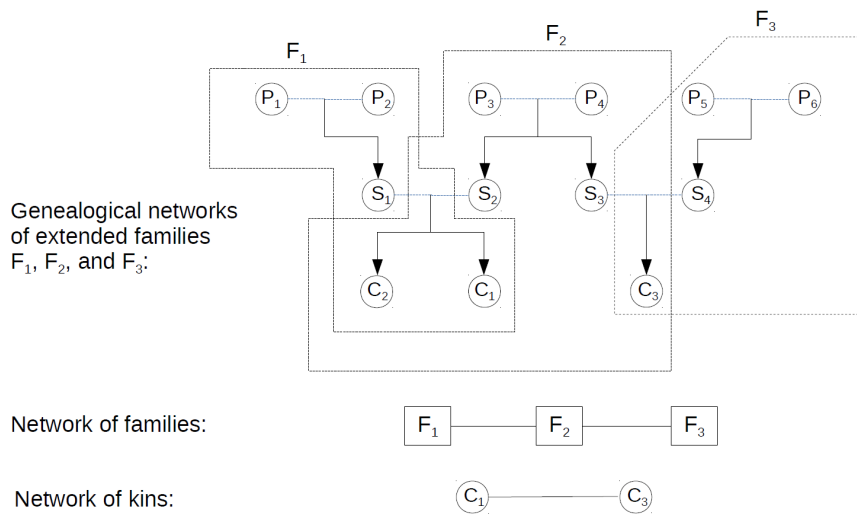

Additional file 1: Network construction.  $F_1$ ,  $F_2$ , and  $F_3$  are families denoted by polygons enclosing the family members, such that,  $F_1 = \{P_1, P_2, S_1, C_1, C_2\}$ ,  $F_2 = \{P_3, P_4, S_2, S_3, C_1, C_2, C_3\}$ , and  $F_3 = \{P_5, P_6, S_4, C_3\}$ . Here,  $P_1$ ,  $P_2$ ,  $P_3$ ,  $P_4$ ,  $P_5$ , and  $P_6$  belong to generation zero,  $S_1$ ,  $S_2$ ,  $S_3$ , and  $S_4$  belong to the first generation, and  $C_1$ ,  $C_2$ , and  $C_3$  belong to the second generation. The dashed links between individuals indicate parental unions. Thus in the network of families the union  $(S_1, S_2)$  connects families  $F_1$  and  $F_2$ , and the union  $(S_3, S_4)$  connects families  $F_2$  and  $F_3$ . Assume that between siblings  $C_1$  and  $C_2$ , the firstborn is  $C_1$ . Then we associate  $C_1$  to the link  $(F_1, F_2)$ . Similarly, we associate  $C_3$  to the link  $(F_2, F_3)$ . In the network of families  $F_2$  being the common node, the links  $(F_1, F_2)$  and  $(F_2, F_3)$  are adjacent. Therefore, in the network of kins we connect the individuals  $C_1$  and  $C_3$  attributed to these links, respectively. In this particular case  $C_1$  and  $C_3$  are first cousins.
